# Supplementary material for: Astrovirus in Reunion Free-Tailed Bat (Mormopterus francoismoutoui)
Source: MDPI journal article supplement (doi:10.3390/v13081524), 2021-08-02
Supplement: s1 [file s1]

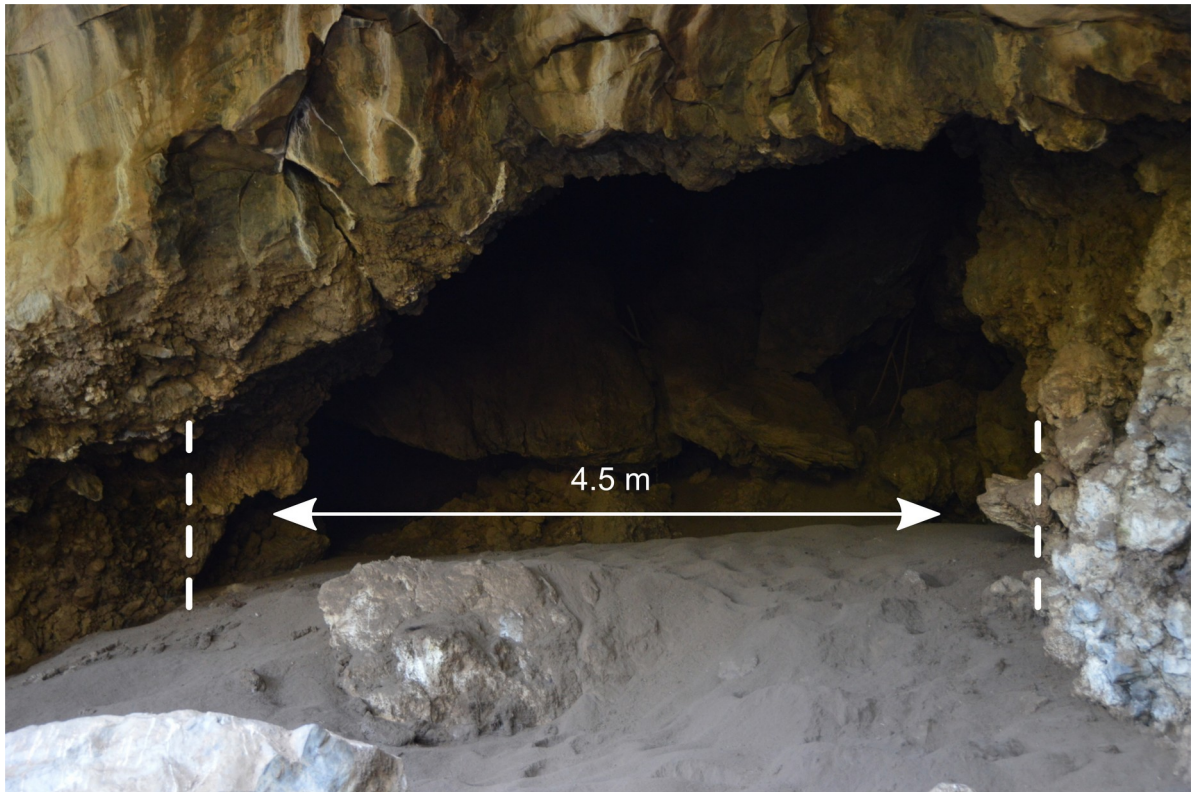

**Figure S1.** Cave entrance of the studied colony. The narrowest part of the entrance is approximately 4.5 m width and 2m high.

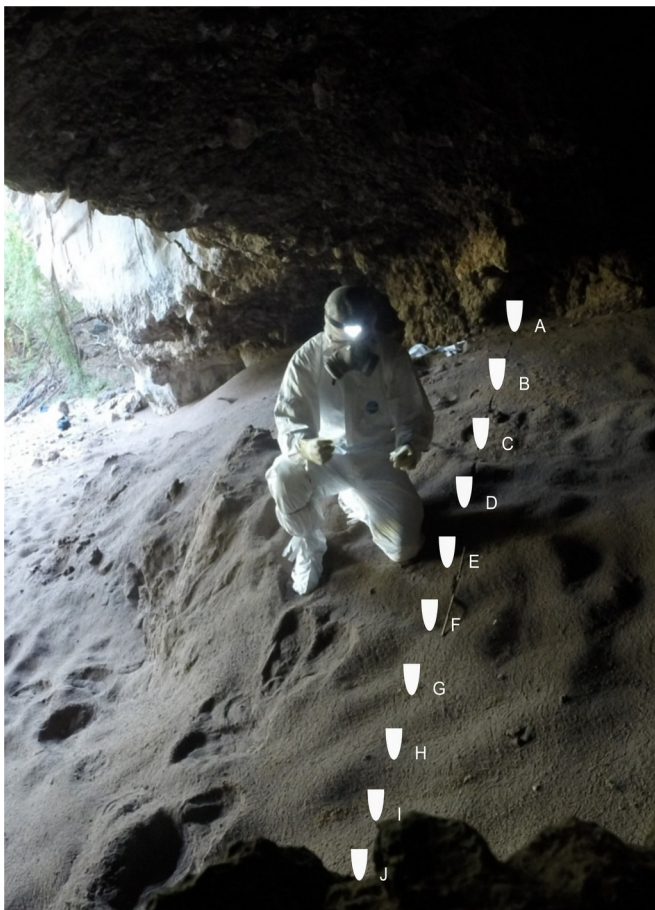

**Figure S2.** Sampling transect at the cave entrance. Ten guano samples separated by 50 cm (A to J) were collected in each sampling session.
